# Supplementary material
Source: publisher site journal article supplement (https://www.dovepress.com/article/419538)
Supplement: Supplementary file 1 [file get_supplementary_file.php]

**Supplementary Online Content**

**Supplementary Table 1.** PRISMA-7 and qSOFA scoring criteria

| The PRISMA-7 score | score |  | qSOFA score | score |
| --- | --- | --- | --- | --- |
| 1. Whether the age over 85 years old | Yes 1  No 0 |  | 1. Respiratory rate ≥22 breaths/min | 1 point |
| 2. Male or female |  | 2. Systolic blood pressure ≤100mmHg | 1 point |
| 3. Limited activity due to health problems |  | 3. Altered consciousness (Glasgow score ≤13) | 1 point |
| 4. Need help with daily activities |  | Sum up | 3 points |
| 5. Whether you can't go out because of health problems |  |  |  |
| 6. Whether you need social support |  |  |  |
| 7. Use a walking aid (crutches, walkers, or wheelchairs) |  |  |  |
| Sum up | 7 points |  |  |  |

**Supplementary Table 2.** ESI scoring criteria

|  | Level 1 | Level 2 | Level 3 | Level 4 | Level 5 |
| --- | --- | --- | --- | --- | --- |
| 1. Vital Functions (ABC) and level of consciousness | There is no response | Severe pain | Stabilization | Stable | Stable |
| 2 Life threatening or organ threatening | obvious | Still possible | Unlikely | There is no | There is no |
| 3. Whether resuscitation is needed | Immediately | Sometimes it's necessary | Rarely needed | No need | Not needed |
| 4. Anticipated resources (X-rays, laboratory tests, consultations, procedures, etc.) | Large amount  (≥2) | more  (≥2) | A moderate amount  (≥2) | less  (1) | less  (or not) |
| 5 Reaction time | Immediate | A few minutes | < 1 hour | Can wait | Can wait |
| Note: ABC stands for Airway, Breath and Circulation. | | | | | |

**Supplementary Table 3.** CFS scoring criteria

| score | Criteria for judging |
| --- | --- |
| 1 | Very fit: strong, active, energetic, full of energy, regular physical exercise, and in the healthiest condition for your age |
| 2 | Healthy: no obvious symptoms of disease, but not as healthy as grade 1, regular physical exercise, occasionally very active, such as seasonally |
| 3 | Maintenance of health: Present health deficits can be managed with no regular physical exercise other than regular walking |
| 4 | Vulnerability: Not needing help in daily life, but having a physical condition that limits daily activities. Common complaints are "moving slowly" during the day and feeling tired |
| 5 | Mild frailty: Marked slowness of movement, need for assistance with advanced instrumental activities of daily living (IADLs), and mild frailty further impairs the ability to shop, walk, prepare meals, and do household chores alone |
| 6 | Moderate frailty: Requires assistance with all outdoor activities, walking up and down stairs indoors, bathing, and may need assistance with dressing |
| 7 | Severe frailty: personal life is completely unable to take care of itself, but the physical condition is stable and there is no risk of death for some time (6 months) |
| 8 | Very severe frailty: life is completely unable to take care of itself, near the end of life, has been unable to recover from any illness |
| 9 | End stage: A terminally ill patient who is near the end of life, with less than 6 months to live, and is otherwise not significantly frail |
